# Supplementary material
Source: publisher figshare collection journal article supplement (https://gsajournals.figshare.com/ndownloader/files/28693608)
Supplement: Supplementary file 1 [file 28693608]

## Sheet: File S4
File S4: Statistical analysis of gene expression of P. fuliginea BSW20306 chromosome and chromid using Wilcoxon signed-rank test
Replicon	Pangene	RPKM median upper half/right half	RPKM median lower half/left half	P-value	Adjusted P-value	Is RPKM median on upper half significantly different than RPKM median on lower half?			Repliccon	RPKM median upper half/right half	RPKM median lower half/left half	P-value	Is RPKM median on upper half significantly different than RPKM median on lower half?
P. fuliginea BSW20308 4 ℃									P. fuliginea Bsw 20308 4 ℃
Chromosome	Core	76.5	66	0.04364	0.0873	No			Chromosome	38	24	0.00019504	Yes
	Softcore	74	65	0.02536	0.0761	No			Chromid (upper/lower half)	18	22	0.3302	No
	Shell	24	16	3.3e-08	1.32e-07	Yes			Chromid (right/left half)	21	19	0.9068	No
	Cloud	15	12	0.1512	0.151	No
									P. fuliginea Bsw 20308 15 ℃
Chromid (upper/lower half)	Core	64.5	54	0.5641	0.7066	No			Chromosome	55	36	0.00019504	Yes
	Softcore	64.5	51	0.3533	0.7066	No			Chromid (upper/lower half)	30	31	0.9882	No
	Shell	15	22	0.06146	0.18438	No			Chromid (right/left half)	31	31	0.7182	No
	Cloud	8	15.5	0.04607	0.18428	No
									P. fuliginea Bsw 20308 32 ℃
Chromid (right/left half)	Core	91	59.5	0.4162	0.478	No			Chromosome	26	19	0.00019504	Yes
	Softcore	102	56	0.1343	0.478	No			Chromid (upper/lower half)	20	21	0.7848	No
	Shell	21	15	0.1195	0.478	No			Chromid (right/left half)	20	21	0.074	No
	Cloud	13	8	0.2361	0.478	No
P. fuliginea BSW20308 15 ℃
Chromosome	Core	84	65	4.43e-06	7.314e-06	Yes
	Softcore	82	64	3.648e-06	2.1888e-05	Yes
	Shell	43	28	2.2e-16	3.52e-15	Yes
	Cloud	37	26	6.488e-05	6.488e-05	Yes
Chromid (upper/lower half)	Core	73	47	0.2628	0.7664	No
	Softcore	71.5	47	0.2211	0.7664	No
	Shell	26	30	0.1916	0.7664	No
	Cloud	27	32	0.3497	0.7664	No
Chromid (right/left half)	Core	80	64	0.9059	1	No
	Softcore	88	54	0.4831	1	No
	Shell	30	25	0.08055	0.3222	No
	Cloud	30	25	0.3638	1	No
P. fuliginea BSW20308 32 ℃
Chromosome	Core	41	40	0.2042	0.4084	No
	Softcore	39	38	0.2118	0.4084	No
	Shell	18	14	7.368e-06	2.9472e-05	Yes
	Cloud	15	13	0.06826	0.20478	No
Chromid (upper/lower half)	Core	41.5	26	0.1895	0.758	No
	Softcore	40.5	26	0.19	0.758	No
	Shell	18	21	0.3202	0.758	No
	Cloud	17.5	15	0.4663	0.758	No
Chromid (right/left half)	Core	39.5	37	0.6115	1	No
	Softcore	40	33	0.4614	1	No
	Shell	18	19	0.3762	1	No
	Cloud	15	14	0.3524	1	No
